# Supplementary material for: A novel cadmium imidazolate framework (CdIF) with ice-XII structure of itv topology
Source: Royal Society of Chemistry journal article supplement (doi:10.1039/c1ce05055a), 2011-01-01

## Supporting Information

# A Novel Cadmium Imidazolate Framework (CdIF) with Ice-XII Structure of *itv* Topology

*Yan-Tao Li, Shi-Yan Yao, Yan Wang, Ke-Hui Cui, Chun-Jie Jiang\*, Yun-Qi Tian\**

Institute of Chemistry For Functionalized Materials, College of Chemistry and Chemical Engineering,  
Liaoning Normal University, Huanghe Road 850, Dalian 116029, People's Republic of China.

Tel: +86-411-892159141, Fax: +86-41182156989, E-mail: yqtian@lnnu.edu.cn.

**Figure S1: IR spectrum of CdIF-13**

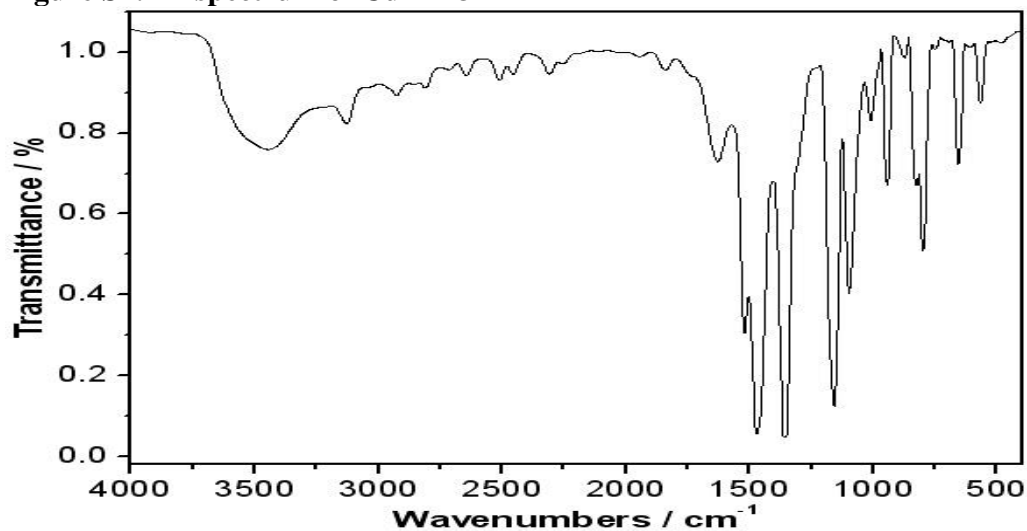

**Figure S-2: TGA-DTA of CdIF-13:**

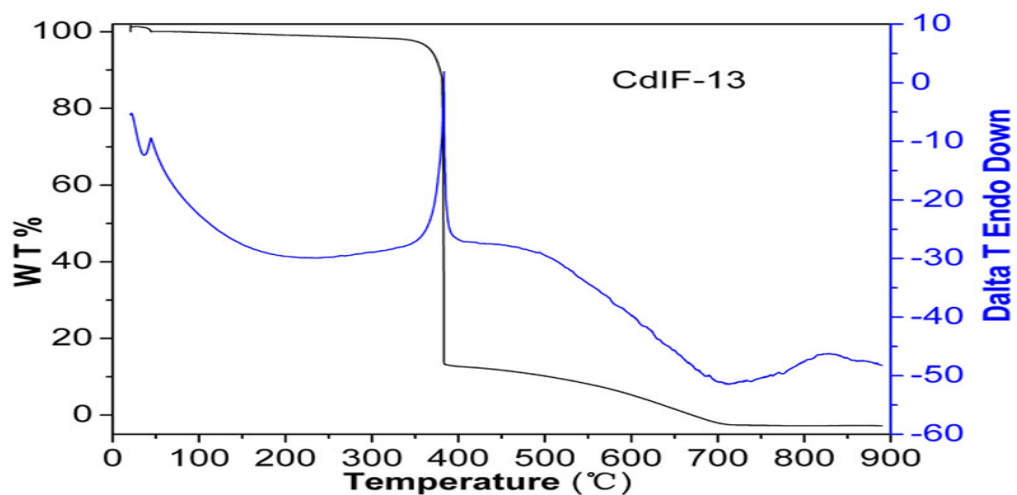

**Figure S-3: XRPD of the compound with unknown structure obtained by reaction of  $\text{Cd}(\text{OAc})_2 \cdot 2\text{H}_2\text{O}$  with Hnim.**

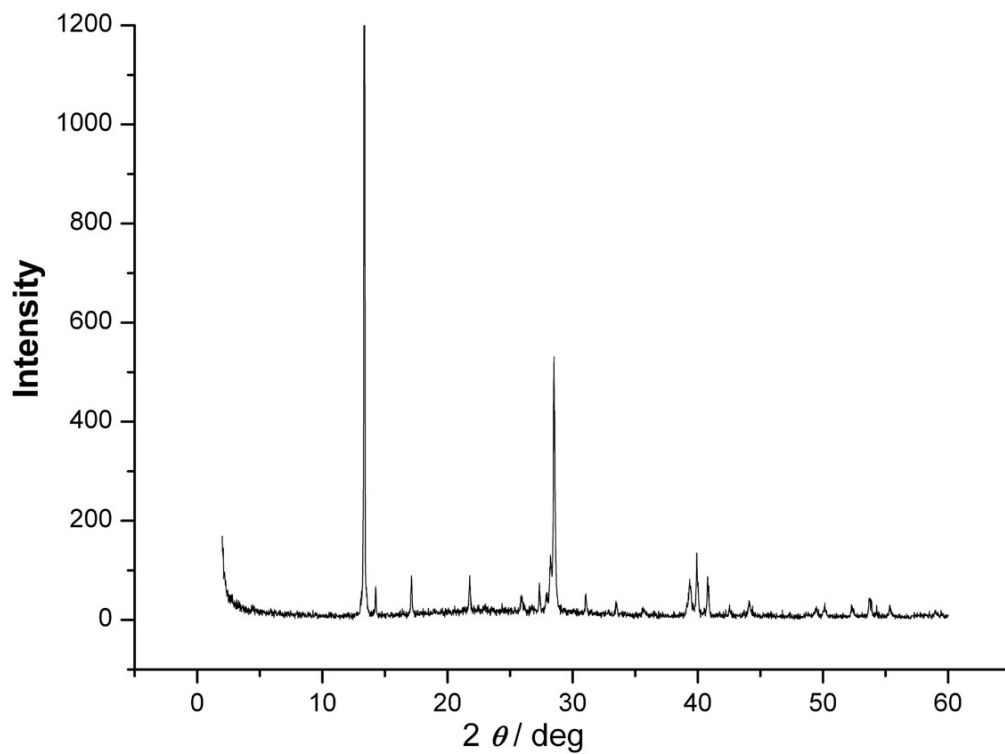

Supplement: c1ce05055a.pdf [file c1ce05055a.pdf]
